# Supplementary material for: Microarray Gene Expression Analysis to Evaluate Cell Type Specific Expression of Targets Relevant for Immunotherapy of Hematological Malignancies
Source: PubMed Central journal article supplement (PMC4865094; doi:10.1371/journal.pone.0155165), 2016-05-12
Supplement: pone.0155165.s009.pdf [file pone.0155165.s009.pdf]

**S4 Table: Gene expression as induced in different non-hematopoietic cells by IFN- $\gamma$**

| Probe ID <sup>a</sup> | Gene <sup>b</sup> | FB <sup>c</sup>  |                 | FB + IFN- $\gamma$ <sup>d</sup> |        | KC <sup>e</sup> |       | KC + IFN- $\gamma$ <sup>f</sup> |        | PTEC <sup>g</sup> |        | PTEC + IFN- $\gamma$ <sup>h</sup> |        | MEL <sup>i</sup> |        | MEL + IFN- $\gamma$ <sup>j</sup> |        | HUVEC <sup>k</sup> |        | HUVEC + IFN- $\gamma$ <sup>l</sup> |         |
|-----------------------|-------------------|------------------|-----------------|---------------------------------|--------|-----------------|-------|---------------------------------|--------|-------------------|--------|-----------------------------------|--------|------------------|--------|----------------------------------|--------|--------------------|--------|------------------------------------|---------|
|                       |                   | AVG <sup>m</sup> | SD <sup>m</sup> | AVG <sup>n</sup>                | SD     | AVG             | SD    | AVG                             | SD     | AVG               | SD     | AVG                               | SD     | AVG              | SD     | AVG                              | SD     | AVG                | SD     | AVG                                | SD      |
| ILMN_2329927          | ABCG1             | 48.84            | 0.1             | 49.90                           | 5.8    | 81.75           | 21.1  | <b>1035.69</b>                  | 252.9  | 50.06             | 1.6    | 54.51                             | 6.9    | 44.59            | 2.0    | 48.09                            | 4.9    | 150.05             | 21.7   | 98.93                              | 16.9    |
| ILMN_1763666          | ALDH3B2           | 49.61            | 0.1             | 46.71                           | 2.6    | 189.23          | 44.3  | <b>5453.54</b>                  | 1219.8 | 46.83             | 3.6    | 50.84                             | 4.3    | 43.76            | 4.3    | 48.32                            | 4.6    | 38.85              | 0.2    | 41.77                              | 0.5     |
| ILMN_2363880          | ALDH3B2           | 54.16            | 0.2             | 52.95                           | 2.7    | 72.33           | 11.1  | <b>962.44</b>                   | 427.3  | 54.65             | 2.4    | 55.87                             | 2.2    | 56.12            | 5.5    | 58.23                            | 4.1    | 45.37              | 4.2    | 41.72                              | 3.1     |
| ILMN_1692332          | ALOX12B           | 51.75            | 0.1             | 51.18                           | 3.6    | 54.84           | 5.8   | <b>933.92</b>                   | 134.3  | 52.97             | 2.3    | 51.53                             | 4.0    | 48.58            | 2.3    | 48.44                            | 0.9    | 45.34              | 1.1    | 40.87                              | 4.1     |
| ILMN_1756862          | APOL3             | 159.03           | 0.6             | <b>1947.70</b>                  | 459.5  | 49.63           | 6.4   | <b>640.93</b>                   | 208.9  | 75.73             | 10.1   | 404.24                            | 81.3   | 45.81            | 1.2    | 59.00                            | 14.6   | 194.68             | 160.5  | 1638.69                            | 590.1   |
| ILMN_1762284          | ASPRV1            | 58.08            | 0.0             | 57.51                           | 5.0    | 53.05           | 2.2   | <b>1152.97</b>                  | 459.9  | 55.18             | 4.3    | 60.09                             | 5.6    | 72.56            | 7.9    | 68.28                            | 5.4    | 49.69              | 1.0    | 49.94                              | 1.1     |
| ILMN_1723480          | BST2              | 115.21           | 1.0             | 602.93                          | 306.3  | 67.15           | 14.4  | <b>898.60</b>                   | 138.7  | 702.79            | 229.8  | 1569.08                           | 273.2  | 227.37           | 96.1   | 384.41                           | 129.3  | 511.90             | 506.5  | 1248.34                            | 1181.2  |
| ILMN_1677198          | C1R               | 1852.86          | 1.2             | 4264.54                         | 2880.8 | 156.71          | 67.2  | 1299.28                         | 248.7  | 264.47            | 256.3  | 1632.03                           | 596.7  | 56.32            | 12.4   | 101.82                           | 30.5   | 52.36              | 5.5    | <b>987.57</b>                      | 259.9   |
| ILMN_1764109          | C1R               | 1709.28          | 1.4             | 4510.50                         | 3015.5 | 111.55          | 66.5  | <b>1211.92</b>                  | 247.7  | 232.46            | 200.7  | 1218.73                           | 332.8  | 62.81            | 6.4    | 101.00                           | 32.1   | 58.07              | 1.2    | <b>733.80</b>                      | 113.5   |
| ILMN_1781626          | C1S               | 2733.16          | 0.6             | 10171.05                        | 3994.1 | 113.80          | 22.5  | <b>846.83</b>                   | 313.2  | 225.07            | 179.0  | <b>2447.75</b>                    | 1696.2 | 54.04            | 4.2    | 86.21                            | 17.2   | 63.89              | 3.8    | <b>1524.57</b>                     | 649.4   |
| ILMN_1773352          | CCL5              | 54.39            | 0.2             | 73.26                           | 20.2   | 54.55           | 1.3   | <b>2737.69</b>                  | 1472.4 | 60.95             | 11.7   | 182.60                            | 56.6   | 91.06            | 16.9   | 106.04                           | 69.7   | 60.86              | 0.4    | 58.66                              | 2.9     |
| ILMN_2098126          | CCL5              | 57.79            | 0.2             | 72.36                           | 18.0   | 61.30           | 8.7   | <b>1980.55</b>                  | 706.8  | 73.48             | 26.5   | 263.78                            | 109.3  | 114.04           | 35.4   | 150.66                           | 83.7   | 88.92              | 3.4    | 82.33                              | 5.3     |
| ILMN_1736567          | CD74              | 77.09            | 0.8             | <b>3767.31</b>                  | 1778.8 | 68.31           | 25.1  | <b>7122.15</b>                  | 3193.4 | 301.65            | 91.9   | <b>15682.34</b>                   | 3869.4 | 58.57            | 2.8    | <b>1633.06</b>                   | 845.3  | 50.41              | 3.5    | <b>6673.13</b>                     | 1222.4  |
| ILMN_2379644          | CD74              | 61.66            | 0.6             | <b>1642.13</b>                  | 898.2  | 53.63           | 3.4   | <b>2318.52</b>                  | 842.6  | 133.58            | 56.4   | <b>4314.29</b>                    | 716.8  | 44.68            | 5.7    | <b>560.01</b>                    | 220.9  | 44.12              | 1.2    | <b>2848.28</b>                     | 1142.9  |
| ILMN_1761464          | CD74              | 47.12            | 0.2             | <b>985.43</b>                   | 776.3  | 49.35           | 6.0   | <b>2704.66</b>                  | 1553.0 | 69.99             | 14.4   | <b>1939.27</b>                    | 899.9  | 44.81            | 7.4    | 249.88                           | 77.0   | 40.52              | 2.3    | 309.32                             | 151.4   |
| ILMN_1712522          | CEACAM6           | 45.48            | 0.1             | 43.42                           | 4.6    | 48.79           | 7.1   | <b>985.71</b>                   | 977.1  | 67.23             | 29.2   | 70.09                             | 36.1   | 41.14            | 3.3    | 43.02                            | 4.0    | 46.19              | 1.3    | 44.51                              | 2.8     |
| ILMN_1774287          | CFB               | 304.78           | 0.9             | 1014.58                         | 450.3  | 128.66          | 14.3  | <b>5047.12</b>                  | 1322.1 | 189.58            | 66.8   | 1658.66                           | 530.1  | 54.19            | 4.3    | 61.49                            | 7.3    | 83.75              | 22.2   | 353.69                             | 164.0   |
| ILMN_1803838          | CNFN              | 93.28            | 0.3             | 75.92                           | 21.3   | 196.52          | 45.6  | <b>8871.86</b>                  | 1546.6 | 81.94             | 2.7    | 66.44                             | 2.5    | 109.86           | 12.3   | 92.76                            | 20.6   | 72.91              | 13.3   | 64.48                              | 14.4    |
| ILMN_1803452          | CRCT1             | 61.52            | 0.2             | 55.13                           | 2.0    | 119.52          | 57.9  | <b>4816.55</b>                  | 2047.1 | 47.39             | 0.7    | 51.37                             | 2.4    | 50.83            | 6.0    | 50.52                            | 6.5    | 55.02              | 0.4    | 54.00                              | 4.0     |
| ILMN_1697733          | CST6              | 103.71           | 1.2             | 53.76                           | 10.2   | 99.92           | 46.5  | <b>2001.80</b>                  | 1302.7 | 143.03            | 58.2   | 174.10                            | 100.7  | 49.59            | 2.9    | 48.88                            | 4.0    | 55.37              | 2.6    | 55.20                              | 6.3     |
| ILMN_1698666          | CST6              | 79.79            | 0.8             | 50.15                           | 3.7    | 127.88          | 74.4  | <b>1807.84</b>                  | 1407.5 | 138.67            | 40.1   | 202.76                            | 100.5  | 45.67            | 1.9    | 44.24                            | 4.7    | 44.30              | 0.3    | 45.73                              | 1.2     |
| ILMN_1654072          | CX3CL1            | 49.39            | 0.1             | 56.89                           | 4.3    | 134.20          | 47.6  | <b>2110.01</b>                  | 827.4  | 403.92            | 166.7  | 2121.91                           | 962.7  | 51.93            | 3.4    | 50.39                            | 1.7    | 133.02             | 43.4   | 649.37                             | 600.8   |
| ILMN_1791759          | CXCL10            | 50.13            | 0.1             | 187.09                          | 128.1  | 136.35          | 96.2  | <b>17124.49</b>                 | 8744.2 | 54.74             | 10.1   | <b>2037.19</b>                    | 1558.5 | 53.98            | 10.1   | 87.52                            | 21.7   | 69.02              | 0.6    | <b>15285.57</b>                    | 16284.2 |
| ILMN_1745356          | CXCL9             | 54.28            | 0.2             | 214.43                          | 158.3  | 41.93           | 6.0   | <b>4979.47</b>                  | 4668.8 | 48.87             | 4.8    | <b>507.69</b>                     | 571.4  | 50.43            | 2.1    | 89.30                            | 29.9   | 44.66              | 1.0    | <b>14988.97</b>                    | 19786.6 |
| ILMN_1686573          | DEFB1             | 51.22            | 0.1             | 52.32                           | 5.9    | 633.89          | 236.4 | <b>10526.60</b>                 | 6622.4 | 1816.05           | 1946.7 | 883.34                            | 565.2  | 45.94            | 8.1    | 45.16                            | 5.3    | 47.79              | 2.7    | <b>53.22</b>                       | 1.9     |
| ILMN_1684308          | DEFB103B          | 55.06            | 0.2             | 53.17                           | 4.1    | 63.96           | 13.8  | <b>7264.68</b>                  | 7549.3 | 49.21             | 2.3    | 54.45                             | 4.7    | 52.69            | 4.5    | 49.26                            | 2.8    | 58.58              | 0.7    | 52.89                              | 1.0     |
| ILMN_1714587          | DEFB103B          | 50.71            | 0.1             | 49.86                           | 2.7    | 53.23           | 4.7   | <b>2182.45</b>                  | 1939.4 | 46.29             | 2.5    | 50.05                             | 2.4    | 45.53            | 1.2    | 46.63                            | 2.2    | 46.71              | 2.9    | 47.94                              | 3.2     |
| ILMN_1733998          | DHRS9             | 52.63            | 0.1             | 53.11                           | 9.8    | 79.20           | 10.4  | <b>2211.26</b>                  | 2488.2 | 78.67             | 25.3   | 54.43                             | 7.6    | 49.61            | 2.9    | 50.49                            | 2.9    | 64.24              | 1.4    | 74.75                              | 2.5     |
| ILMN_1769201          | ELF3              | 47.54            | 0.1             | 49.41                           | 4.0    | 63.21           | 9.5   | <b>739.08</b>                   | 506.2  | 867.37            | 122.3  | 1078.05                           | 154.1  | 56.94            | 6.1    | 56.35                            | 0.9    | 56.94              | 2.6    | 61.41                              | 1.1     |
| ILMN_1671600          | EPS8L1            | 49.09            | 0.2             | 46.40                           | 4.6    | 83.61           | 24.7  | <b>879.20</b>                   | 406.4  | 95.58             | 29.4   | 82.11                             | 24.3   | 114.34           | 29.4   | 88.67                            | 16.7   | 104.74             | 63.1   | 93.78                              | 52.4    |
| ILMN_2388547          | EPST11            | 113.74           | 0.7             | <b>1647.95</b>                  | 506.8  | 317.50          | 175.0 | 2245.49                         | 275.1  | 350.78            | 64.1   | 3297.06                           | 297.7  | 366.54           | 214.8  | 498.67                           | 112.1  | 85.62              | 20.6   | <b>993.58</b>                      | 415.0   |
| ILMN_1701114          | GBP1              | 173.11           | 0.4             | <b>2023.51</b>                  | 706.8  | 150.79          | 84.2  | 1135.13                         | 297.1  | 200.54            | 44.8   | <b>2493.85</b>                    | 1102.2 | 128.84           | 95.6   | 827.20                           | 273.8  | 134.26             | 62.1   | <b>3115.13</b>                     | 2505.9  |
| ILMN_2148785          | GBP1              | 125.72           | 0.4             | 1239.64                         | 132.5  | 116.18          | 39.8  | 497.33                          | 118.5  | 109.20            | 44.3   | <b>1258.73</b>                    | 406.2  | 78.70            | 31.8   | 538.87                           | 248.4  | 150.13             | 42.2   | <b>3480.33</b>                     | 2692.5  |
| ILMN_1774077          | GBP2              | 603.04           | 0.8             | <b>12958.95</b>                 | 5995.9 | 89.61           | 17.4  | <b>3991.82</b>                  | 1595.7 | 1435.90           | 760.5  | <b>16358.86</b>                   | 7106.1 | 135.98           | 28.5   | <b>1920.36</b>                   | 953.9  | 518.73             | 260.1  | <b>9395.13</b>                     | 5650.8  |
| ILMN_1771385          | GBP4              | 48.66            | 0.2             | <b>725.83</b>                   | 211.4  | 51.44           | 4.5   | <b>902.42</b>                   | 195.9  | 71.79             | 15.3   | <b>2237.92</b>                    | 305.7  | 50.86            | 5.2    | 124.59                           | 67.2   | 72.91              | 11.6   | <b>2401.53</b>                     | 308.5   |
| ILMN_2114568          | GBP5              | 55.38            | 0.1             | <b>892.66</b>                   | 507.3  | 60.87           | 24.8  | <b>1138.56</b>                  | 226.2  | 46.33             | 3.7    | <b>5276.27</b>                    | 789.8  | 44.24            | 1.1    | 50.40                            | 6.7    | 44.09              | 2.1    | <b>2017.36</b>                     | 1414.2  |
| ILMN_2188862          | GDF15             | 1059.99          | 0.4             | 1072.21                         | 600.2  | 198.91          | 159.0 | <b>3104.88</b>                  | 2204.0 | 2550.20           | 2171.0 | 5469.76                           | 2321.4 | 726.40           | 235.3  | 2450.76                          | 2072.3 | 4771.94            | 1280.1 | 3503.67                            | 216.0   |
| ILMN_1803945          | HCP5              | 77.79            | 0.4             | <b>958.35</b>                   | 460.8  | 656.35          | 301.3 | <b>3072.55</b>                  | 1779.9 | 254.44            | 65.1   | 2029.85                           | 535.5  | 449.64           | 451.6  | 1056.99                          | 905.8  | 48.92              | 0.9    | <b>569.00</b>                      | 235.4   |
| ILMN_1758623          | HIST1H2BD         | 210.09           | 0.3             | 334.05                          | 105.0  | 295.16          | 103.9 | <b>4056.45</b>                  | 2697.8 | 94.68             | 15.9   | 109.31                            | 33.9   | 649.55           | 153.6  | 617.30                           | 34.9   | 61.36              | 1.3    | 62.48                              | 9.3     |
| ILMN_1651496          | HIST1H2BD         | 287.15           | 0.3             | 420.55                          | 176.9  | 409.24          | 193.7 | <b>5452.04</b>                  | 3516.2 | 103.39            | 4.6    | 132.37                            | 46.8   | 1063.49          | 169.2  | 1013.49                          | 66.1   | 68.91              | 5.1    | 70.99                              | 16.6    |
| ILMN_1778401          | HLA-B             | 907.11           | 0.9             | <b>9361.50</b>                  | 1594.6 | 1635.81         | 252.0 | <b>17150.88</b>                 | 6003.9 | 2165.09           | 1430.9 | 14946.59                          | 964.3  | 2928.13          | 2434.1 | 11274.35                         | 2700.4 | 305.69             | 119.6  | <b>8580.11</b>                     | 3072.6  |
| ILMN_1695311          | HLA-DMA           | 396.45           | 0.8             | <b>6931.34</b>                  | 2366.2 | 236.17          | 111.9 | <b>4290.23</b>                  | 960.5  | 296.47            | 53.2   | <b>4341.77</b>                    | 2171.5 | 268.77           | 72.6   | <b>4124.57</b>                   | 415.3  | 118.99             | 46.0   | <b>2158.77</b>                     | 2130.0  |
| ILMN_1761733          | HLA-DMB           | 65.93            | 0.7             | <b>1780.86</b>                  | 967.1  | 56.33           | 12.8  | <b>2044.10</b>                  | 785.5  | 1072.82           | 206.4  | 3251.26                           | 1203.6 | 62.33            | 20.3   | <b>737.00</b>                    | 40.8   | 63.16              | 5.6    | <b>1047.80</b>                     | 845.0   |
| ILMN_1659075          | HLA-DOA           | 50.75            | 0.1             | <b>1231.98</b>                  | 741.6  | 44.49           | 8.9   | 247.60                          | 138.4  | 46.69             | 1.5    | <b>852.73</b>                     | 754.7  | 46.01            | 2.5    | 251.80                           | 72.0   | 51.47              | 6.1    | 376.36                             | 230.0   |
| ILMN_1772218          | HLA-DPA1          | 116.29           | 0.8             | <b>5347.41</b>                  | 3408.7 | 45.00           | 1.4   | <b>5898.30</b>                  | 3368.2 | 67.18             | 6.3    | <b>3476.02</b>                    | 2001.4 | 226.50           | 192.2  | <b>2819.46</b>                   | 1753.3 | 55.11              | 6.1    | <b>1527.72</b>                     | 1152.5  |
| ILMN_1808405          | HLA-DQA1          | 55.12            | 0.2             | <b>1200.68</b>                  | 1121.2 | 43.22           | 2.7   | <b>1594.54</b>                  | 1138.9 | 44.10             | 1.9    | <b>1238.75</b>                    | 960.5  | 43.13            | 6.5    | 309.54                           | 147.8  | 41.21              | 1.4    | <b>455.84</b>                      | 448.5   |
| ILMN_2157441          | HLA-DRA           | 96.33            | 1.0             | <b>5896.75</b>                  | 2407.4 | 50.73           | 2.2   | <b>8090.95</b>                  | 751.2  | 64.95             | 14.3   | <b>7896.86</b>                    | 3547.8 | 59.93            | 10.1   | <b>3979.94</b>                   | 923.2  | 54.50              | 1.6    | <b>4817.07</b>                     | 2652.6  |
| ILMN_1689655          | HLA-DRA           | 120.13           | 1.2             | <b>13994.52</b>                 | 4867.1 | 51.71           | 3.1   | <b>16149.33</b>                 | 6775.5 | 69.65             | 14.1   | <b>8802.78</b>                    | 5386.2 | 55.33            | 8.7    | <b>4770.78</b>                   | 1192.5 | 72.54              | 6.4    | <b>3582.60</b>                     | 2716.6  |
| ILMN_1715169          | HLA-DRB1          | 52.87            | 0.3             | 272.20                          | 263.5  | 45.56           | 5.0   | 316.79                          | 227.4  | 53.89             | 3.2    | <b>638.04</b>                     | 41.7   | 47.29            | 5.5    | 297.85                           | 212.7  | 54.96              | 0.2    | 57.51                              | 1.1     |

| Probe ID <sup>a</sup> | Gene <sup>b</sup> | FB <sup>c</sup>  |                 | FB + IFN- $\gamma$ <sup>d</sup> |        | KC <sup>e</sup> |        | KC + IFN- $\gamma$ <sup>f</sup> |         | PTEC <sup>g</sup> |        | PTEC + IFN- $\gamma$ <sup>h</sup> |        | MEL <sup>i</sup> |        | MEL + IFN- $\gamma$ <sup>j</sup> |        | HUVEC <sup>k</sup> |        | HUVEC + IFN- $\gamma$ <sup>l</sup> |        |        |        |
|-----------------------|-------------------|------------------|-----------------|---------------------------------|--------|-----------------|--------|---------------------------------|---------|-------------------|--------|-----------------------------------|--------|------------------|--------|----------------------------------|--------|--------------------|--------|------------------------------------|--------|--------|--------|
|                       |                   | AVG <sup>m</sup> | SD <sup>m</sup> | AVG <sup>n</sup>                | SD     | AVG             | SD     | AVG                             | SD      | AVG               | SD     | AVG                               | SD     | AVG              | SD     | AVG                              | SD     | AVG                | SD     | AVG                                | SD     | AVG    | SD     |
| ILMN_1752592          | HLA-DRB4          | 80.20            | 0.5             | <b>4722.43</b>                  | 3240.0 | 63.89           | 14.3   | <b>9081.97</b>                  | 10653.3 | 61.87             | 5.8    | <b>2789.86</b>                    | 483.3  | 59.24            | 1.3    | <b>3116.55</b>                   | 2734.7 | 62.92              | 4.3    | <b>2740.59</b>                     | 2753.1 | 2753.1 | 4.4    |
| ILMN_1697499          | HLA-DRB5          | 61.78            | 0.5             | 439.61                          | 775.9  | 48.06           | 3.4    | <b>1972.46</b>                  | 2024.2  | 47.41             | 3.7    | <b>2414.16</b>                    | 1278.0 | 45.96            | 6.1    | <b>1061.59</b>                   | 908.5  | 46.57              | 2.8    | 48.44                              | 4.4    | 4.4    | 4.4    |
| ILMN_2066066          | HLA-DRB6          | 52.99            | 0.1             | 231.58                          | 66.0   | 56.97           | 10.1   | 396.13                          | 36.8    | 56.42             | 1.2    | 371.08                            | 101.0  | 55.20            | 7.1    | 264.19                           | 36.0   | 49.87              | 5.4    | <b>702.18</b>                      | 568.2  | 568.2  | 103.7  |
| ILMN_2186806          | HLA-F             | 216.76           | 0.6             | 815.38                          | 143.3  | 364.69          | 75.9   | 2206.76                         | 533.1   | 371.17            | 245.1  | 2035.55                           | 946.4  | 519.52           | 295.8  | 1016.74                          | 572.3  | 194.52             | 72.4   | <b>1946.75</b>                     | 103.7  | 103.7  | 103.7  |
| ILMN_2130441          | HLA-H             | 1416.17          | 0.6             | 9505.64                         | 1554.9 | 2118.79         | 133.5  | 11458.84                        | 1271.5  | 2174.33           | 1698.4 | 13557.52                          | 3087.1 | 4030.01          | 3242.4 | 10037.66                         | 5575.5 | 651.59             | 351.7  | <b>9103.70</b>                     | 171.5  | 171.5  | 171.5  |
| ILMN_2316236          | HOPX              | 45.94            | 0.1             | 42.92                           | 5.1    | 138.08          | 76.0   | <b>2507.79</b>                  | 432.2   | 58.52             | 3.8    | 41.71                             | 1.0    | 48.73            | 4.7    | 44.02                            | 3.5    | 147.44             | 91.6   | 226.15                             | 173.8  | 173.8  | 173.8  |
| ILMN_2058782          | IFI27             | 632.45           | 0.9             | <b>8740.06</b>                  | 8071.3 | 14560.92        | 9119.4 | 25672.22                        | 808.3   | 229.73            | 293.4  | <b>2802.31</b>                    | 1266.4 | 8251.50          | 9949.4 | 8078.30                          | 4960.9 | 5575.76            | 389.9  | <b>7839.86</b>                     | 5570.8 | 5570.8 | 5570.8 |
| ILMN_1723912          | IFI44L            | 88.38            | 0.7             | <b>1204.84</b>                  | 453.2  | 420.66          | 327.9  | 1397.99                         | 544.1   | 254.71            | 135.9  | <b>3737.78</b>                    | 296.1  | 2091.36          | 981.5  | 3245.26                          | 692.0  | 131.47             | 37.5   | <b>1500.45</b>                     | 753.1  | 753.1  | 753.1  |
| ILMN_1739428          | IFIT2             | 164.99           | 0.2             | <b>2214.68</b>                  | 576.0  | 212.66          | 88.9   | <b>2151.56</b>                  | 1623.0  | 224.64            | 112.9  | 2156.26                           | 265.6  | 1110.65          | 480.2  | 2026.69                          | 486.0  | 61.63              | 0.6    | 176.29                             | 27.0   | 27.0   | 27.0   |
| ILMN_1701789          | IFIT3             | 277.23           | 0.5             | <b>5719.26</b>                  | 1860.9 | 600.17          | 448.6  | 5257.17                         | 2311.6  | 339.85            | 126.6  | <b>4337.01</b>                    | 354.1  | 3155.73          | 1894.5 | 6597.25                          | 2651.4 | 60.53              | 6.3    | <b>732.62</b>                      | 220.4  | 220.4  | 220.4  |
| ILMN_1801246          | IFITM1            | 1117.55          | 1.2             | 9494.69                         | 3342.8 | 3503.69         | 1844.2 | 17076.49                        | 837.7   | 4407.33           | 2726.6 | 23031.44                          | 893.8  | 3985.89          | 3134.6 | 14673.66                         | 5747.0 | 155.79             | 87.8   | <b>1637.90</b>                     | 1283.6 | 1283.6 | 1283.6 |
| ILMN_2334296          | IL18BP            | 121.12           | 0.1             | <b>4541.91</b>                  | 2733.1 | 73.80           | 19.9   | <b>1258.71</b>                  | 223.4   | 145.65            | 38.5   | <b>8542.26</b>                    | 2796.2 | 85.65            | 4.7    | 541.61                           | 280.5  | 272.38             | 157.1  | <b>3289.94</b>                     | 212.3  | 212.3  | 212.3  |
| ILMN_1804901          | IL1F5             | 49.36            | 0.2             | 52.07                           | 7.8    | 72.91           | 6.4    | <b>888.23</b>                   | 86.5    | 49.05             | 2.4    | 54.00                             | 2.2    | 52.98            | 4.0    | 55.31                            | 3.1    | 42.38              | 3.4    | 41.52                              | 2.2    | 2.2    | 2.2    |
| ILMN_2368530          | IL32              | 57.32            | 0.2             | 210.39                          | 74.3   | 74.24           | 6.8    | <b>1227.70</b>                  | 225.6   | 608.33            | 531.3  | 1470.46                           | 1547.2 | 51.85            | 6.1    | 52.15                            | 10.6   | 1922.19            | 1012.3 | 2679.37                            | 1611.7 | 1611.7 | 1611.7 |
| ILMN_1778010          | IL32              | 78.33            | 0.2             | 356.41                          | 214.5  | 79.44           | 17.2   | <b>1033.18</b>                  | 452.3   | 454.47            | 337.1  | 815.64                            | 698.4  | 53.89            | 3.4    | 51.30                            | 0.8    | 526.22             | 456.5  | <b>686.87</b>                      | 601.3  | 601.3  | 601.3  |
| ILMN_1656310          | INDO              | 45.82            | 0.3             | <b>525.29</b>                   | 132.5  | 59.43           | 15.1   | <b>340.77</b>                   | 266.9   | 59.23             | 14.7   | <b>1360.05</b>                    | 819.0  | 49.24            | 4.0    | 86.92                            | 18.1   | 44.89              | 0.2    | <b>2549.94</b>                     | 1035.2 | 1035.2 | 1035.2 |
| ILMN_1708375          | IRF1              | 378.04           | 0.8             | 2621.77                         | 246.6  | 196.84          | 19.1   | <b>4635.05</b>                  | 2186.4  | 1053.01           | 505.7  | 5612.52                           | 2483.5 | 221.94           | 84.3   | 1715.14                          | 649.4  | 214.73             | 193.6  | <b>2441.88</b>                     | 179.7  | 179.7  | 179.7  |
| ILMN_1695924          | KLK11             | 53.19            | 0.2             | 50.59                           | 4.5    | 802.88          | 179.3  | <b>10005.51</b>                 | 2019.0  | 47.30             | 4.5    | 50.59                             | 3.4    | 49.22            | 4.6    | 47.91                            | 4.3    | 55.29              | 5.9    | 50.29                              | 3.1    | 3.1    | 3.1    |
| ILMN_1745570          | KLK7              | 55.77            | 0.2             | 64.67                           | 8.1    | 1300.40         | 728.1  | <b>15106.71</b>                 | 6679.6  | 84.20             | 49.4   | 68.63                             | 11.9   | 56.67            | 3.9    | 56.57                            | 9.1    | 48.37              | 2.7    | 47.63                              | 1.7    | 1.7    | 1.7    |
| ILMN_1791545          | KRT23             | 74.38            | 0.1             | 70.16                           | 13.3   | 124.39          | 42.6   | <b>2088.33</b>                  | 1200.5  | 85.89             | 26.6   | 64.48                             | 6.9    | 104.50           | 12.7   | 88.69                            | 16.1   | 47.56              | 1.6    | 47.43                              | 4.3    | 4.3    | 4.3    |
| ILMN_1705814          | KRT80             | 77.66            | 0.5             | 48.93                           | 5.6    | 87.15           | 29.0   | <b>7107.21</b>                  | 2982.1  | 551.53            | 267.0  | 197.97                            | 88.2   | 50.82            | 3.3    | 48.89                            | 2.5    | 303.35             | 22.4   | 223.93                             | 1.7    | 1.7    | 1.7    |
| ILMN_2170814          | LAMP3             | 55.19            | 0.4             | 119.83                          | 127.9  | 76.10           | 21.9   | <b>1048.95</b>                  | 275.9   | 53.25             | 9.0    | <b>549.14</b>                     | 145.3  | 48.29            | 4.8    | 64.23                            | 12.4   | 323.06             | 26.2   | 419.63                             | 22.6   | 22.6   | 22.6   |
| ILMN_1808220          | LCE3E             | 66.39            | 0.3             | 64.63                           | 14.8   | 56.19           | 7.2    | <b>802.66</b>                   | 396.4   | 53.53             | 9.7    | 65.71                             | 12.2   | 60.13            | 6.0    | 58.36                            | 3.6    | 51.24              | 2.6    | 51.57                              | 4.3    | 4.3    | 4.3    |
| ILMN_1659688          | LGALS3BP          | 544.76           | 0.8             | 1396.51                         | 911.7  | 644.97          | 299.3  | 1007.35                         | 384.4   | 1181.26           | 513.3  | 2832.00                           | 660.7  | 3228.87          | 1842.7 | 4620.85                          | 2686.5 | 45.16              | 1.2    | <b>480.59</b>                      | 92.3   | 92.3   | 92.3   |
| ILMN_2412214          | LGALS9            | 67.59            | 0.4             | 314.35                          | 196.5  | 56.63           | 5.6    | 56.83                           | 5.9     | 67.32             | 6.6    | 198.68                            | 59.5   | 87.12            | 27.7   | 92.45                            | 39.4   | 94.55              | 34.4   | <b>975.77</b>                      | 235.6  | 235.6  | 235.6  |
| ILMN_2332964          | LGMN              | 627.24           | 0.5             | 560.58                          | 70.3   | 424.37          | 80.7   | <b>5382.45</b>                  | 2008.1  | 505.11            | 46.6   | 1106.87                           | 235.8  | 319.24           | 47.5   | 419.66                           | 67.4   | 470.90             | 38.3   | <b>681.96</b>                      | 106.8  | 106.8  | 106.8  |
| ILMN_1815895          | LOC649143         | 48.16            | 0.1             | <b>496.09</b>                   | 411.0  | 46.77           | 4.4    | <b>995.65</b>                   | 242.8   | 46.62             | 3.8    | <b>714.91</b>                     | 792.5  | 47.59            | 1.4    | <b>604.77</b>                    | 769.9  | 58.81              | 2.1    | <b>880.51</b>                      | 810.9  | 810.9  | 810.9  |
| ILMN_1722670          | LYNX1             | 48.19            | 0.2             | 46.55                           | 5.1    | 54.21           | 8.6    | <b>842.70</b>                   | 443.5   | 46.51             | 6.0    | 49.77                             | 9.9    | 48.51            | 2.7    | 50.88                            | 6.9    | 46.05              | 2.2    | 47.37                              | 0.7    | 0.7    | 0.7    |
| ILMN_1718033          | LYPD5             | 44.27            | 0.1             | 61.20                           | 16.9   | 106.35          | 13.0   | <b>1951.04</b>                  | 1216.2  | 55.10             | 3.4    | 89.77                             | 13.3   | 52.32            | 5.2    | 66.97                            | 15.7   | 56.74              | 7.3    | 70.75                              | 3.8    | 3.8    | 3.8    |
| ILMN_2388484          | MAP2              | 59.78            | 0.3             | 82.31                           | 24.2   | 98.60           | 18.6   | <b>1171.85</b>                  | 722.7   | 58.57             | 6.7    | 79.79                             | 3.2    | 47.16            | 1.8    | 53.15                            | 3.2    | 113.04             | 27.6   | 107.14                             | 8.1    | 8.1    | 8.1    |
| ILMN_1801610          | METRNL            | 536.69           | 0.3             | 591.33                          | 251.6  | 63.46           | 4.9    | <b>694.96</b>                   | 345.5   | 62.40             | 7.5    | 74.02                             | 12.3   | 117.07           | 24.8   | 138.34                           | 14.0   | 131.82             | 14.2   | 115.86                             | 13.4   | 13.4   | 13.4   |
| ILMN_2371911          | MUC1              | 143.36           | 0.6             | 202.42                          | 53.2   | 74.92           | 21.0   | <b>1000.48</b>                  | 263.6   | 1568.28           | 1073.0 | 2580.89                           | 1351.5 | 73.54            | 7.5    | 77.76                            | 8.5    | 49.12              | 2.2    | 60.31                              | 16.0   | 16.0   | 16.0   |
| ILMN_1662358          | MX1               | 718.26           | 1.9             | <b>10730.74</b>                 | 7371.9 | 5578.05         | 4398.0 | 17909.55                        | 2646.0  | 2081.13           | 1510.0 | 13433.93                          | 4637.0 | 20289.26         | 6972.0 | 19984.79                         | 6859.6 | 309.04             | 70.4   | 2534.77                            | 893.0  | 893.0  | 893.0  |
| ILMN_1713397          | NCCRP1            | 50.95            | 0.2             | 53.63                           | 2.8    | 105.54          | 46.3   | <b>2133.37</b>                  | 612.5   | 100.53            | 41.2   | 61.27                             | 4.9    | 447.73           | 398.4  | 163.58                           | 124.6  | 44.15              | 0.6    | 46.92                              | 0.4    | 0.4    | 0.4    |
| ILMN_1674063          | OAS2              | 253.92           | 0.6             | <b>4329.48</b>                  | 1836.7 | 3083.40         | 1274.9 | <b>7362.87</b>                  | 2188.3  | 117.20            | 106.3  | <b>1897.39</b>                    | 368.1  | 3043.40          | 1688.0 | 3615.51                          | 1555.6 | 202.56             | 89.1   | 1208.07                            | 194.9  | 194.9  | 194.9  |
| ILMN_1693192          | PI3               | 48.98            | 0.1             | 44.36                           | 1.9    | 965.35          | 557.7  | <b>11419.86</b>                 | 2677.6  | 283.62            | 195.0  | 65.43                             | 10.3   | 50.67            | 3.8    | 48.72                            | 2.4    | 43.94              | 2.9    | 42.29                              | 0.7    | 0.7    | 0.7    |
| ILMN_1815023          | PIM1              | 1176.16          | 1.1             | 901.48                          | 359.0  | 354.74          | 45.6   | <b>4939.44</b>                  | 2578.8  | 747.24            | 343.8  | 943.70                            | 416.6  | 102.64           | 21.6   | 96.69                            | 19.9   | 87.08              | 32.5   | 96.57                              | 23.4   | 23.4   | 23.4   |
| ILMN_2376108          | PSMB9             | 187.57           | 0.7             | <b>2542.10</b>                  | 516.9  | 243.36          | 9.9    | 1042.49                         | 419.2   | 288.94            | 29.2   | 2723.48                           | 655.0  | 403.61           | 274.2  | 1086.98                          | 313.4  | 78.08              | 47.5   | <b>1358.51</b>                     | 1202.1 | 1202.1 | 1202.1 |
| ILMN_1800091          | RARRES1           | 52.02            | 0.2             | 118.93                          | 82.1   | 48.70           | 2.1    | <b>1661.48</b>                  | 1005.2  | 89.68             | 18.2   | 193.27                            | 89.9   | 55.11            | 6.2    | 58.95                            | 2.3    | 62.65              | 6.4    | 69.09                              | 10.6   | 10.6   | 10.6   |
| ILMN_1701613          | RARRES3           | 286.89           | 0.7             | <b>12942.20</b>                 | 5804.9 | 128.36          | 21.7   | <b>8772.33</b>                  | 2324.2  | 2348.77           | 337.8  | <b>28950.28</b>                   | 602.9  | 171.05           | 44.9   | 383.49                           | 106.1  | 62.17              | 22.9   | <b>1809.49</b>                     | 1367.0 | 1367.0 | 1367.0 |
| ILMN_1683179          | RRAD              | 86.19            | 0.6             | 63.27                           | 2.1    | 69.76           | 9.0    | <b>1201.41</b>                  | 880.7   | 1611.67           | 1019.4 | 1444.14                           | 481.5  | 45.99            | 4.5    | 47.28                            | 3.5    | 56.15              | 1.7    | 53.73                              | 0.5    | 0.5    | 0.5    |
| ILMN_1801216          | S100P             | 51.84            | 0.3             | 104.19                          | 117.8  | 58.75           | 11.5   | <b>12726.25</b>                 | 1851.0  | 85.61             | 34.5   | 72.25                             | 29.3   | 49.15            | 4.8    | 43.18                            | 1.8    | 42.09              | 2.0    | 41.94                              | 1.5    | 1.5    | 1.5    |
| ILMN_1712759          | SBSN              | 244.46           | 1.0             | 182.80                          | 167.6  | 300.96          | 100.   |                                 |         |                   |        |                                   |        |                  |        |                                  |        |                    |        |                                    |        |        |        |

| Probe ID <sup>a</sup> | Gene <sup>b</sup> | FB <sup>c</sup>  |                 | FB + IFN- $\gamma$ <sup>d</sup> |        | KC <sup>e</sup> |       | KC + IFN- $\gamma$ <sup>f</sup> |        | PTEC <sup>g</sup> |       | PTEC + IFN- $\gamma$ <sup>h</sup> |        | MEL <sup>i</sup> |        | MEL + IFN- $\gamma$ <sup>j</sup> |        | HUVEC <sup>k</sup> |       | HUVEC + IFN- $\gamma$ <sup>l</sup> |        |
|-----------------------|-------------------|------------------|-----------------|---------------------------------|--------|-----------------|-------|---------------------------------|--------|-------------------|-------|-----------------------------------|--------|------------------|--------|----------------------------------|--------|--------------------|-------|------------------------------------|--------|
|                       |                   | AVG <sup>m</sup> | SD <sup>m</sup> | AVG <sup>n</sup>                | SD     | AVG             | SD    | AVG                             | SD     | AVG               | SD    | AVG                               | SD     | AVG              | SD     | AVG                              | SD     | AVG                | SD    | AVG                                | SD     |
| ILMN_2337655          | WARS              | 1370.47          | 0.3             | 13355.12                        | 3647.9 | 708.45          | 93.3  | <b>20061.52</b>                 | 3727.7 | 996.92            | 110.2 | <b>16604.77</b>                   | 3358.1 | 8180.00          | 4406.7 | 22874.17                         | 4982.5 | 1265.00            | 190.3 | <b>15696.13</b>                    | 8662.5 |
| ILMN_2079042          | WFDC5             | 47.16            | 0.1             | 46.81                           | 1.6    | 144.72          | 22.5  | <b>1549.36</b>                  | 417.2  | 73.51             | 50.8  | 49.54                             | 5.7    | 46.09            | 5.5    | 48.74                            | 5.9    | 52.45              | 0.1   | 49.06                              | 0.8    |
| ILMN_1742618          | XAF1              | 271.66           | 0.4             | 890.16                          | 340.1  | 212.41          | 108.6 | 524.67                          | 213.1  | 86.31             | 40.4  | <b>1080.09</b>                    | 306.0  | 666.42           | 19.6   | 1138.79                          | 305.8  | 180.92             | 132.4 | 518.87                             | 198.4  |

<sup>a</sup> Illumina probe IDs as included in the microarray database. <sup>b</sup> Official gene symbols are depicted for genes that are >10-fold up-regulated by IFN- $\gamma$  in at least one non-hematopoietic cell type. <sup>c</sup> Fibroblasts (FB) cultured without IFN- $\gamma$ . <sup>d</sup> Fibroblasts (FB) cultured with 100 IU/ml IFN- $\gamma$  for 4 days. <sup>e</sup> Keratinocytes (KC) cultured without IFN- $\gamma$ . <sup>f</sup> Keratinocytes (KC) cultured with 100 IU/ml IFN- $\gamma$  for 4 days. <sup>g</sup> Proximal tubular epithelial cells (PTEC) cultured without IFN- $\gamma$ . <sup>h</sup> Proximal tubular epithelial cells (PTEC) cultured with 100 IU/ml IFN- $\gamma$  for 4 days. <sup>i</sup> Melanocytes (MEL) cultured without IFN- $\gamma$ . <sup>j</sup> Melanocytes (MEL) cultured with 100 IU/ml IFN- $\gamma$  for 4 days. <sup>k</sup> Human umbilical vein endothelial cells (HUVEC) cultured without IFN- $\gamma$ . <sup>l</sup> Human umbilical vein endothelial cells (HUVEC) cultured with 100 IU/ml IFN- $\gamma$  for 4 days. <sup>m</sup> AVG and SD are the average and standard deviation of probe fluorescence as measured within the sample group, respectively. <sup>n</sup> Values in grey and bold indicate that the average probe fluorescence as measured in the sample group after culturing with IFN- $\gamma$  is >10-fold higher than the fluorescence measured in the same samples cultured in the absence of cytokines.
